# Supplementary material for: Carbon-Doped TiO2 Activated by X-Ray Irradiation for the Generation of Reactive Oxygen Species to Enhance Photodynamic Therapy in Tumor Treatment
Source: MDPI journal article supplement (doi:10.3390/ijms20092072), 2019-04-26
Supplement: s1 [file s1]

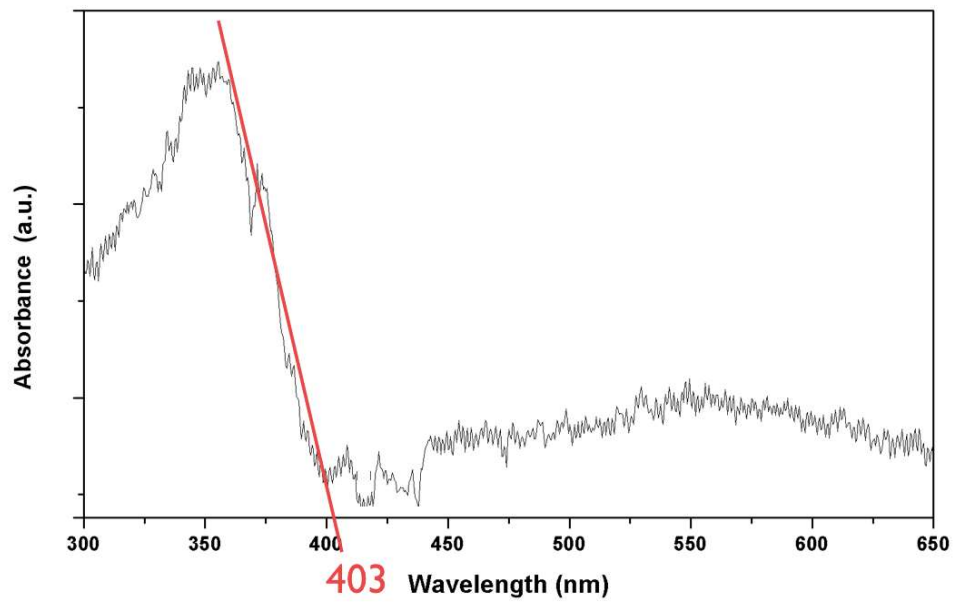

Figure S1. Bandgap of  $\text{TiO}_2\text{:C}$  under X-ray irradiation from UV-Vis spectroscopy.

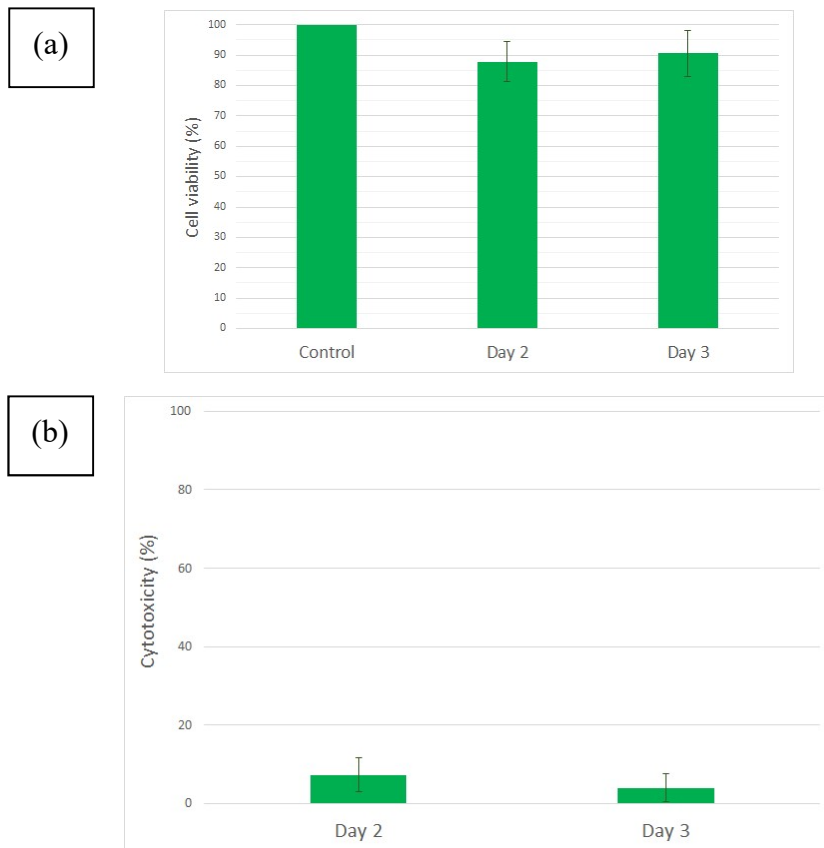

Figure S2. (a) Cell viability and (b) cytotoxicity of the synthesized  $\text{TiO}_2\text{:C}$  at day 2 and day 3.
